# Supplementary material
Source: MDPI journal article supplement (https://www.mdpi.com/2673-4591/56/1/270)
Supplement: s1 [file s1]

Supplementary Materials

# Effect of Temperature, Nutrients and Diuron on Freshwater River Biofilms: A Statistical Approach

Tanaya Bhowmick <sup>1</sup>, Avijit Mohanta <sup>1</sup>, Stéphane Pesce <sup>2</sup>, Goutam Sen <sup>1</sup>, Joydeep Mukherjee <sup>1</sup> and Reshmi Das <sup>1,\*</sup>

<sup>1</sup> School of Environmental Studies, Jadavpur University, Kolkata 700032, India; tanayab.sest.rs@jadavpuruniversity.in (T.B.); avitukai639@gmail.com (A.M.); gksju14@gmail.com (G.S.); joydeep.mukherjee@jadavpuruniversity.in (J.M.)

<sup>2</sup> Riverly Research Unit, Aquatic Microbial Ecotoxicology, INRAE, 69100 Villeurbanne, France; stephane.pesce@inrae.fr

\* Correspondence: reshmidas.sest@jadavpuruniversity.in

† Presented at the 4th International Electronic Conference on Applied Sciences, 27 October–10 November 2023; Available online: <https://asec2023.sciforum.net/>.

**Sampling Details:** Biofilm and water samples were collected from intermediate and downstream stations (~4 km apart) of the Morcille River in France [22] draining watershed areas of which 52% and 72% respectively were vineyards. Biofilm chlorophyll *a*, PS yield and dry weight were measured every month. Water temperature, suspended matter (SM), dissolved organic carbon (DOC), nutrients (NH<sub>4</sub>, NO<sub>2</sub>, NO<sub>3</sub>, PO<sub>4</sub>, Si) and diuron concentrations in the water were expressed as monthly average except in September and December 2008, December 2010 and November 2011 [13,14].

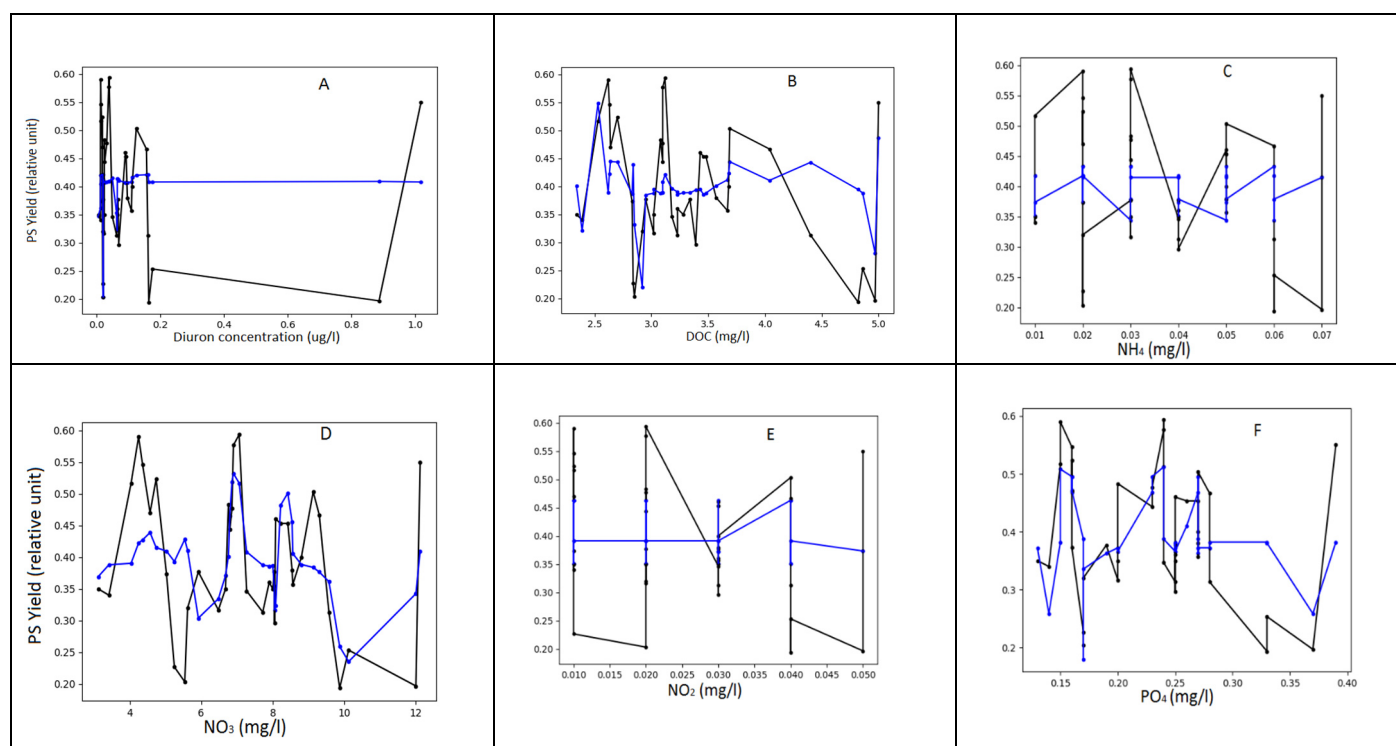

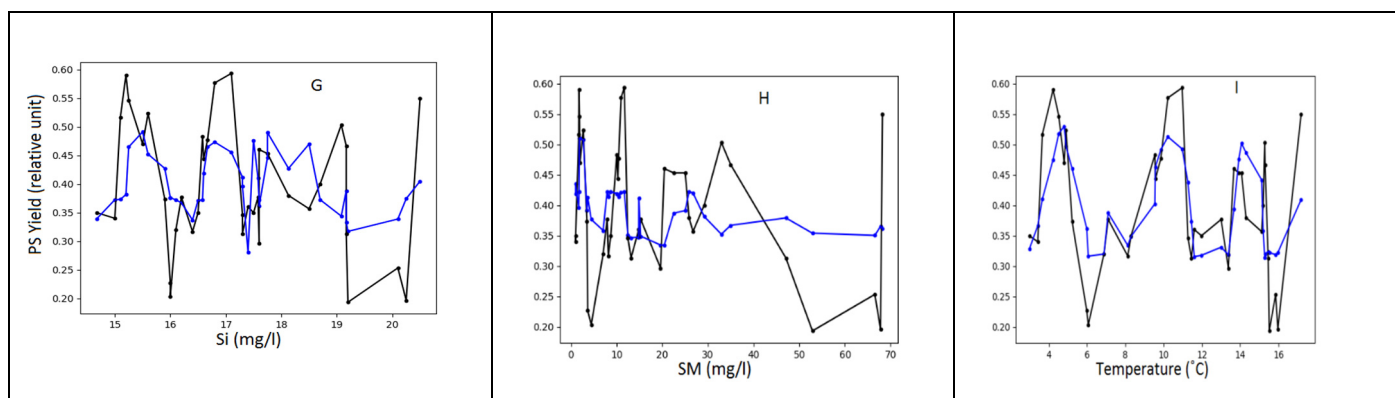

**Figure S1.** Dependent variable (PS Yield) of intermediate station plotted against the independent variables A. Diuron concentration, B. Dissolved Organic Carbon (DOC), C.  $\text{NH}_4$  concentration, D.  $\text{NO}_3$  concentration, E.  $\text{NO}_2$  concentration, F.  $\text{PO}_4$  concentration, G. Si concentration, H. Suspended Matter (SM) and I. Temperature as black lines. Blue lines are plotted after applying basis functions to reduce the effects of non-linearity and understand the relationship between the dependent variable and independent variables.

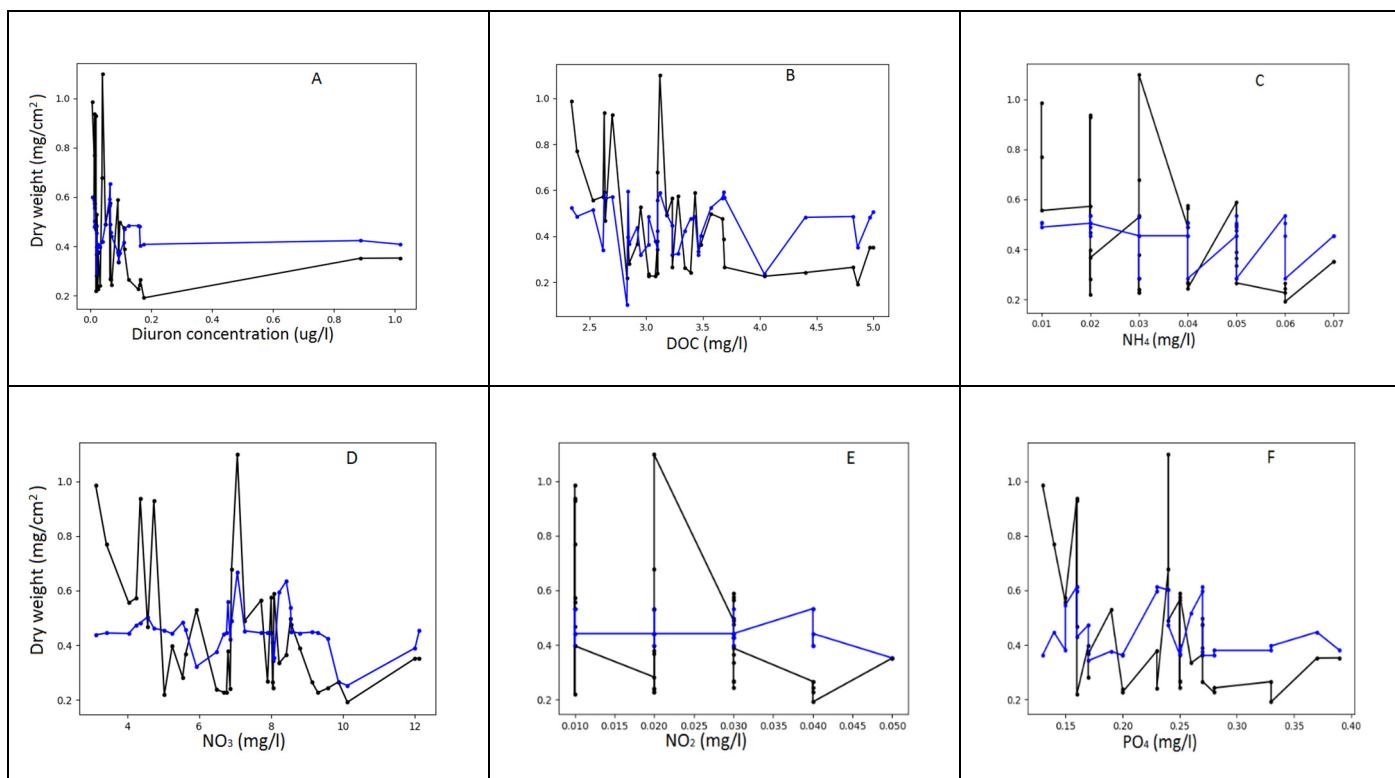

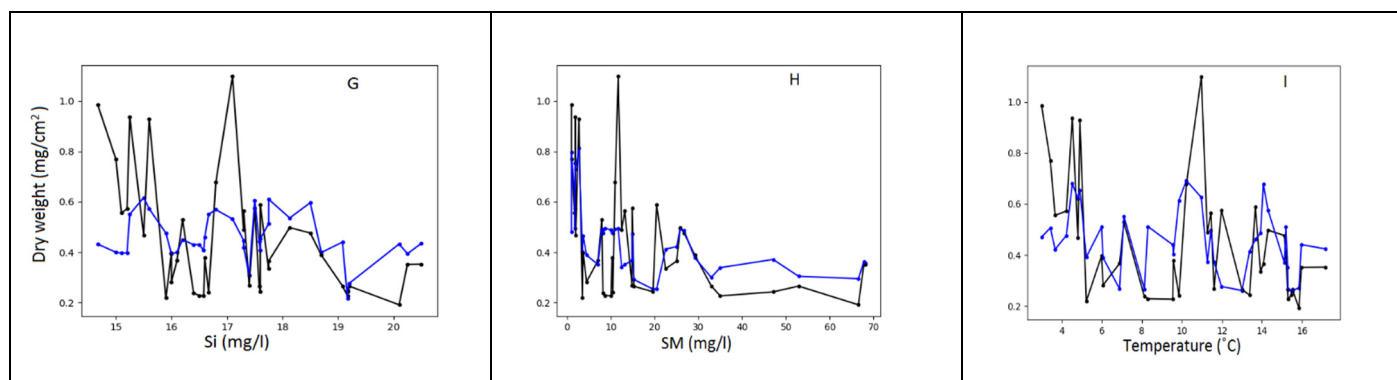

**Figure S2.** Dependent variable (dry weight) of intermediate station plotted against the independent variables A. Diuron concentration, B. Dissolved Organic Carbon (DOC), C.  $\text{NH}_4$  concentration, D.  $\text{NO}_3$  concentration, E.  $\text{NO}_2$  concentration, F.  $\text{PO}_4$  concentration, G. Si concentration, H. Suspended Matter (SM) and I. Temperature as black lines. Blue lines are plotted after applying basis functions to reduce the effects of non-linearity and understand the relationship between the dependent variable and independent variables.

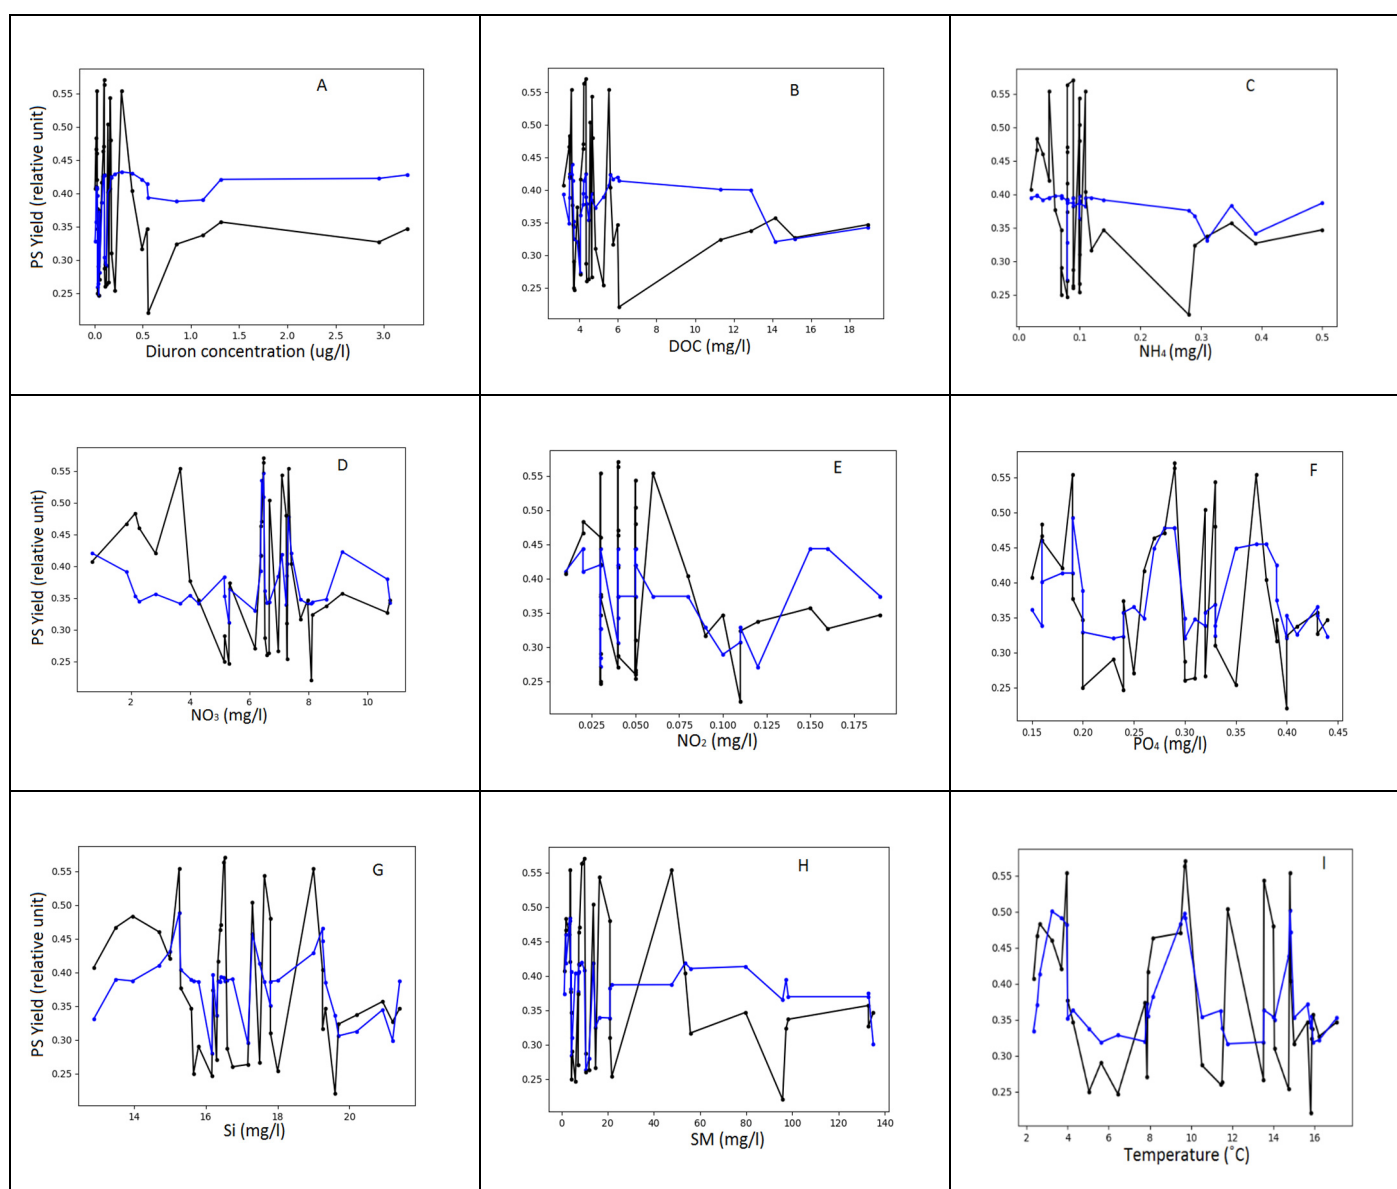

**Figure S3.** Dependent variable (PS Yield) of downstream station plotted against the independent variables A. Diuron concentration, B. Dissolved Organic Carbon (DOC), C.  $\text{NH}_4$  concentration, D.  $\text{NO}_3$  concentration, E.  $\text{NO}_2$  concentration, F.  $\text{PO}_4$  concentration, G. Si concentration, H. Suspended Matter (SM) and I. Temperature as black lines. Blue lines are plotted after applying basis functions to reduce the effects of non-linearity and understand the relationship between the dependent variable and independent variables.

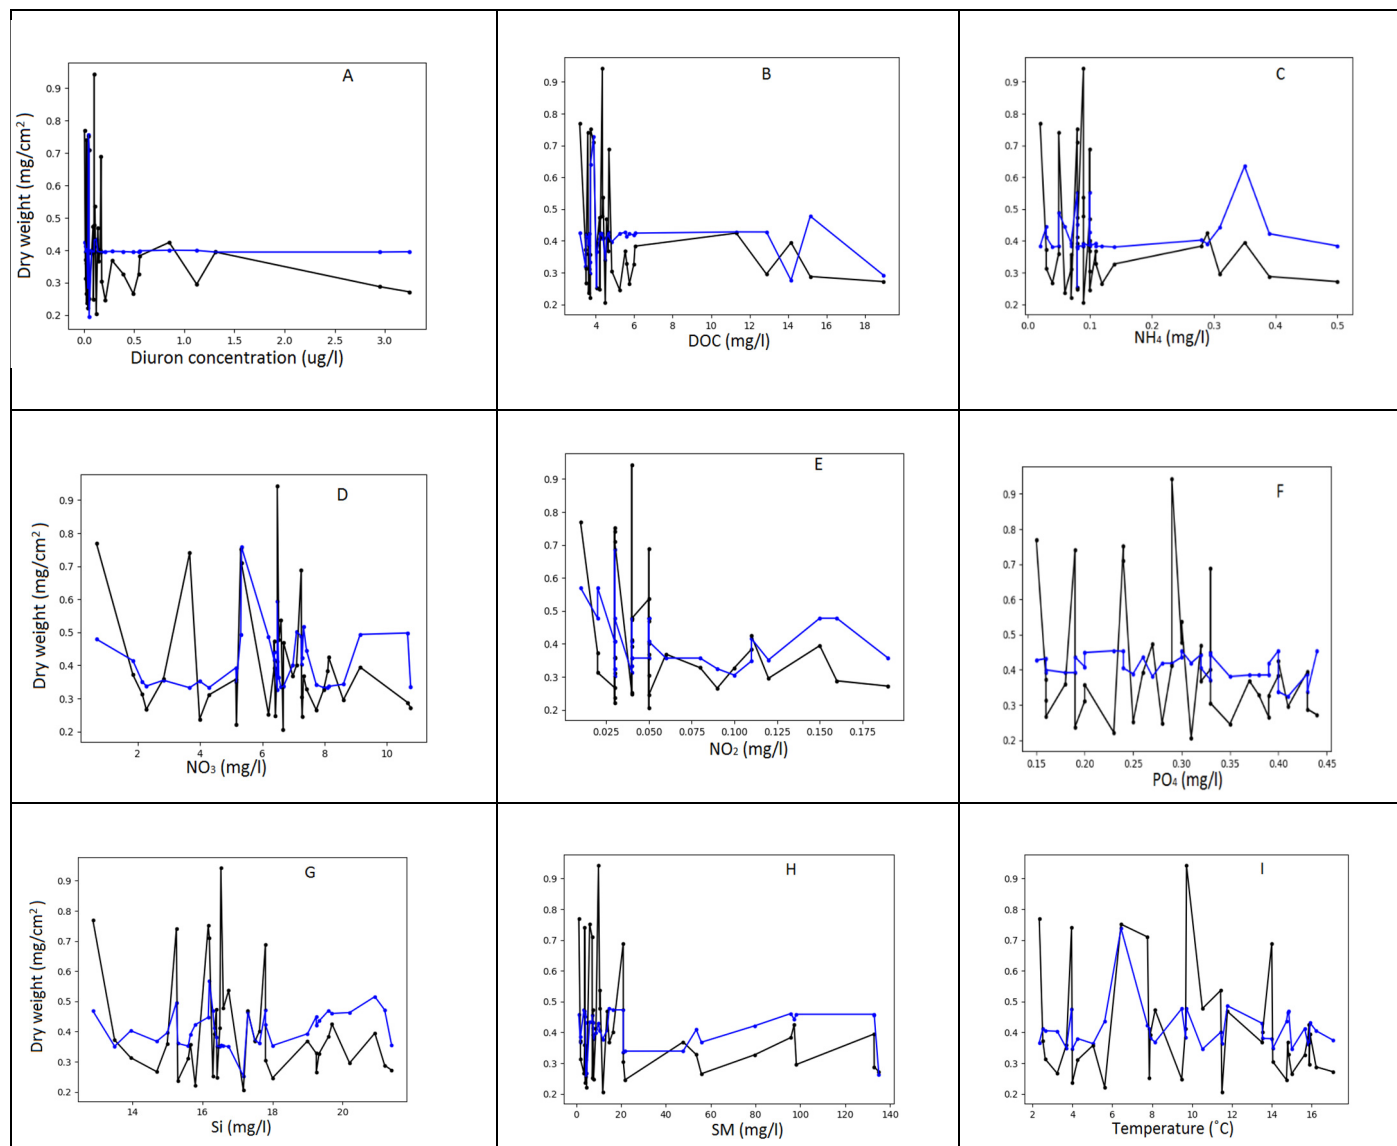

**Figure S4.** Dependent variable (dry weight) of downstream station plotted against the independent variables A. Diuron concentration, B. Dissolved Organic Carbon (DOC), C.  $\text{NH}_4$  concentration, D.  $\text{NO}_3$  concentration, E.  $\text{NO}_2$  concentration, F.  $\text{PO}_4$  concentration, G. Si concentration, H. Suspended Matter (SM) and I. Temperature as black lines. Blue lines are plotted after applying basis functions to reduce the effects of non-linearity and understand the relationship between the dependent variable and independent variables.

**Table S1.** Coefficients of basis functions (dependent variable: dry weight).

| <b>Intermediate station</b> |           |           |           |            |           |           |           |          |           |
|-----------------------------|-----------|-----------|-----------|------------|-----------|-----------|-----------|----------|-----------|
| <b>Coefficients</b>         | y(1)      | y(2)      | y(3)      | y(4)       | y(5)      | y(6)      | y(7)      | y(8)     | y(9)      |
| <b>a<sub>0</sub></b>        | 3.4018    | −21.184   | −7370.63  | −154.52    | 0.191451  | 2.7752    | −0.7155   | 0.308018 | −2.6842   |
| <b>a<sub>1</sub></b>        | −3.07e+00 | 455.47    | 2.07e+03  | 2.08e+02   | 6.617e−02 | −4.37e+02 | 1.95e+02  | 6.5941   | 2.52e+00  |
| <b>a<sub>2</sub></b>        | 1.10e+00  | −3643.36  | −2.32e+02 | −1.10e+02  | −4.61e−03 | 2.70e+04  | −1.06e+04 | −88.533  | −6.79e−01 |
| <b>a<sub>3</sub></b>        | −1.81e−01 | 13942.62  | 1.30e+01  | 2.85e+01   | 1.085e−04 | −7.34e+05 | 2.34e+05  | 473.033  | 8.13e−02  |
| <b>a<sub>4</sub></b>        | 1.39e−02  | −25694.98 | −3.62e−01 | −3.64e+00  | −7.34e−07 | 9.13e+06  | −1.81e+06 | −733.60  | −4.45e−03 |
| <b>a<sub>5</sub></b>        | −4.06e−04 | 18334.64  | 4.02e−03  | 1.83e−01   | −6.95e−10 | −4.25e+07 | −2.74e+05 | 341.98   | 9.08e−05  |
| <b>Downstream station</b>   |           |           |           |            |           |           |           |          |           |
| <b>Coefficients</b>         | y(1)      | y(2)      | y(3)      | y(4)       | y(5)      | y(6)      | y(7)      | y(8)     | y(9)      |
| <b>a<sub>0</sub></b>        | 1.2864    | 0.38986   | −996.76   | −1.3602    | 0.4873    | 0.8732    | 0.8219    | 0.39736  | −1.117    |
| <b>a<sub>1</sub></b>        | −1.09e+00 | 10.668    | 2.948e+02 | 1.188e+00  | −7.41e−03 | −14.725   | −1.46e+01 | −0.0977  | 1.205e+00 |
| <b>a<sub>2</sub></b>        | 5.525e−01 | −151.36   | −3.45e+01 | −2.73e−01  | −2.56e−05 | 153.033   | 9.60e+01  | 0.91326  | −3.30e−01 |
| <b>a<sub>3</sub></b>        | −1.25e−01 | 765.26    | 2.014e+00 | 2.58e−02   | 2.33e−06  | −666.487  | 5.47e+02  | −1.4842  | 4.051e−02 |
| <b>a<sub>4</sub></b>        | 1.26e−02  | −1628.75  | −5.82e−02 | −1.028e−03 | −1.40e−08 | 1287.328  | −7.48e+03 | 0.7107   | −2.28e−03 |
| <b>a<sub>5</sub></b>        | −4.61e−04 | 1237.23   | 6.68e−04  | 1.38e−05   | 6.25e−12  | −917.194  | 1.98e+04  | −0.1030  | 4.845e−05 |

**Table S2.** Coefficients of basis functions (dependent variable: PS yield).

| <b>Intermediate station</b> |           |           |            |            |            |           |            |           |           |
|-----------------------------|-----------|-----------|------------|------------|------------|-----------|------------|-----------|-----------|
| <b>Coefficients</b>         | y(1)      | y(2)      | y(3)       | y(4)       | y(5)       | y(6)      | y(7)       | y(8)      | y(9)      |
| <b>a<sub>0</sub></b>        | 0.38276   | −15.3727  | −4769.31   | −81.308    | 0.3109     | 0.3482    | −0.4467    | 0.4072    | 0.7184    |
| <b>a<sub>1</sub></b>        | −3.70e−01 | 365.056   | 1.35e+03   | 123.16     | 2.55e−02   | −3.57e+00 | 1.37e+02   | −1.51e−01 | −1.12e−01 |
| <b>a<sub>2</sub></b>        | 1.90e−01  | −3224.589 | −1.54e+02  | −73.209    | −1.89e−03  | 3.76e+02  | −7.168e+03 | 1.16e+01  | 2.23e−02  |
| <b>a<sub>3</sub></b>        | −3.65e−02 | 13684.17  | 8.683e+00  | 21.462     | 5.061e−05  | −5.79e+03 | 1.502e+05  | −1.07e+02 | −2.21e−03 |
| <b>a<sub>4</sub></b>        | 3.06e−03  | −28036.67 | −2.447e−01 | −3.1037    | −5.435e−07 | −2.55e+04 | −1.098e+06 | 1.86e+02  | 8.90e−05  |
| <b>a<sub>5</sub></b>        | −9.38e−05 | 22241.97  | 2.753e−03  | 0.177      | 2.004e−09  | 5.99e+05  | −1.66e+05  | −9.02e+01 | −1.00e−06 |
| <b>Downstream station</b>   |           |           |            |            |            |           |            |           |           |
| <b>Coefficients</b>         | y(1)      | y(2)      | y(3)       | y(4)       | y(5)       | y(6)      | y(7)       | y(8)      | y(9)      |
| <b>a<sub>0</sub></b>        | 0.6131    | 4.6599    | −723.611   | 0.6405     | 0.2988     | 0.3611    | −0.0356    | 0.4335    | 0.0637    |
| <b>a<sub>1</sub></b>        | −5.61e−01 | −85.30    | 2.15e+02   | −7.705e−02 | 2.376e−02  | 1.3911    | 4.17e+01   | −0.24177  | 3.82e−01  |
| <b>a<sub>2</sub></b>        | 3.368e−01 | −681.18   | −2.54e+01  | 3.196e−03  | −1.47e−03  | −15.38    | −1.24e+03  | −0.2514   | −1.14e−01 |
| <b>a<sub>3</sub></b>        | −7.98e−02 | −2646.66  | 1.49e+00   | 4.369e−04  | 3.11e−05   | 41.25     | 1.50e+04   | 0.5380    | 1.38e−02  |
| <b>a<sub>4</sub></b>        | 8.116e−03 | 4943.646  | −4.36e−02  | −3.94e−05  | −2.61e−07  | −2.71     | −7.97e+04  | −0.2579   | −7.54e−04 |
| <b>a<sub>5</sub></b>        | −2.93e−04 | −3548.46  | 5.061e−04  | 8.417e−07  | 7.54e−10   | −61.65    | 1.54e+05   | 0.0377    | 1.505e−05 |

**Table S3.** Multiple linear regression model parameters for intermediate station data (dependent variable: dry weight).

| <b>Coefficients</b>         | <b>Estimate</b> | <b>Standard Error</b> | <b>t Value</b> | <b>Pr(&gt; t )</b> |
|-----------------------------|-----------------|-----------------------|----------------|--------------------|
| <i>A</i>                    | −0.9910         | 0.380                 | −2.607         | 0.014              |
| <i>B</i> (NO <sub>3</sub> ) | 0.3661          | 0.437                 | 0.837          | 0.410              |
| <i>C</i> (PO <sub>4</sub> ) | −0.2816         | 0.509                 | −0.553         | 0.585              |
| <i>D</i> (Si)               | 0.4538          | 0.414                 | 1.096          | 0.282              |
| <i>E</i> (DOC)              | 0.6047          | 0.280                 | 2.157          | 0.040              |
| <i>F</i> (SM)               | 0.4058          | 0.300                 | 1.351          | 0.188              |

|                         |          |       |       |       |
|-------------------------|----------|-------|-------|-------|
| G (NH <sub>4</sub> )    | 0.5150   | 0.346 | 1.489 | 0.148 |
| H (NO <sub>2</sub> )    | 0.0258   | 0.569 | 0.045 | 0.964 |
| I (Diuron)              | 0.8068   | 0.442 | 1.827 | 0.078 |
| J (Temp.)               | 0.3134   | 0.356 | 0.880 | 0.387 |
| dF Residuals            | 28       |       |       |       |
| Multiple R squared      | 0.601    |       |       |       |
| Adjusted R squared      | 0.472    |       |       |       |
| Residual standard error | 0.1724   |       |       |       |
| F statistics            | 4.678    |       |       |       |
| p value                 | 0.000765 |       |       |       |

**Table S4.** Multiple linear regression model parameters for downstream station data (dependent variable: dry weight).

| <i>Coefficients</i>     | <i>Estimate</i> | <i>Standard Error</i> | <i>t Value</i> | <i>Pr(&gt; t )</i> |
|-------------------------|-----------------|-----------------------|----------------|--------------------|
| A                       | −1.4242         | 0.453                 | −3.142         | 0.004              |
| B (NO <sub>3</sub> )    | 0.6483          | 0.312                 | 2.076          | 0.048              |
| C (PO <sub>4</sub> )    | 1.8391          | 0.819                 | 2.246          | 0.033              |
| D (Si)                  | 0.2286          | 0.492                 | 0.465          | 0.646              |
| E (DOC)                 | 0.2887          | 0.745                 | 0.387          | 0.701              |
| F (SM)                  | 0.8679          | 0.483                 | 1.796          | 0.084              |
| G (NH <sub>4</sub> )    | 0.1028          | 0.569                 | 0.180          | 0.858              |
| H (NO <sub>2</sub> )    | 0.2745          | 0.375                 | 0.731          | 0.471              |
| I (Diuron)              | −0.0205         | 0.770                 | −0.027         | 0.979              |
| J (Temp.)               | 0.2443          | 0.417                 | 0.586          | 0.563              |
| dF Residuals            | 27              |                       |                |                    |
| Multiple R squared      | 0.531           |                       |                |                    |
| Adjusted R squared      | 0.375           |                       |                |                    |
| Residual standard error | 0.1421          |                       |                |                    |
| F statistics            | 3.396           |                       |                |                    |
| p value                 | 0.00656         |                       |                |                    |

**Table S5.** Multiple linear regression model parameters for intermediate station data (dependent variable: PS yield).

| <i>Coefficients</i>  | <i>Estimate</i> | <i>Standard Error</i> | <i>t Value</i> | <i>Pr(&gt; t )</i> |
|----------------------|-----------------|-----------------------|----------------|--------------------|
| A                    | −0.6479         | 0.247                 | −2.624         | 0.014              |
| B (NO <sub>3</sub> ) | 0.7198          | 0.320                 | 2.246          | 0.033              |
| C (PO <sub>4</sub> ) | 0.4172          | 0.320                 | 1.305          | 0.203              |
| D (Si)               | −0.4817         | 0.437                 | −1.103         | 0.279              |
| E (DOC)              | 0.5038          | 0.251                 | 2.004          | 0.055              |
| F (SM)               | −0.1507         | 0.336                 | −0.448         | 0.657              |
| G (NH <sub>4</sub> ) | 0.1421          | 0.538                 | 0.264          | 0.793              |
| H (NO <sub>2</sub> ) | 0.8462          | 0.286                 | 2.958          | 0.006              |
| I (Diuron)           | 0.3746          | 0.430                 | 0.872          | 0.391              |
| J (Temp.)            | 0.2594          | 0.390                 | 0.665          | 0.511              |
| dF Residuals         | 28              |                       |                |                    |
| Multiple R squared   | 0.714           |                       |                |                    |

|                                |          |
|--------------------------------|----------|
| <i>Adjusted R squared</i>      | 0.622    |
| <i>Residual standard error</i> | 0.0681   |
| <i>F statistics</i>            | 7.774    |
| <i>p value</i>                 | 1.21e−05 |

**Table S6.** Multiple linear regression model parameters for downstream station data (dependent variable: PS yield).

| <i>Coefficients</i>            | <i>Estimate</i> | <i>Standard Error</i> | <i>t Value</i> | <i>Pr(&gt; t )</i> |
|--------------------------------|-----------------|-----------------------|----------------|--------------------|
| <i>A</i>                       | −0.5283         | 0.206                 | −2.563         | 0.016              |
| <i>B (NO<sub>3</sub>)</i>      | 0.5727          | 0.324                 | 1.769          | 0.088              |
| <i>C (PO<sub>4</sub>)</i>      | 0.2116          | 0.383                 | −0.553         | 0.585              |
| <i>D (Si)</i>                  | 0.2680          | 0.335                 | 0.800          | 0.431              |
| <i>E (DOC)</i>                 | 0.1210          | 0.546                 | 0.222          | 0.826              |
| <i>F (SM)</i>                  | 0.5933          | 0.294                 | 2.017          | 0.054              |
| <i>G (NH<sub>4</sub>)</i>      | 0.2020          | 0.622                 | 0.325          | 0.748              |
| <i>H (NO<sub>2</sub>)</i>      | 0.4753          | 0.290                 | 1.637          | 0.113              |
| <i>I (Diuron)</i>              | 0.0887          | 0.337                 | 0.263          | 0.795              |
| <i>J (Temp.)</i>               | 0.2746          | 0.338                 | 0.813          | 0.424              |
| <i>dF Residuals</i>            | 27              |                       |                |                    |
| <i>Multiple R squared</i>      | 0.629           |                       |                |                    |
| <i>Adjusted R squared</i>      | 0.505           |                       |                |                    |
| <i>Residual standard error</i> | 0.0734          |                       |                |                    |
| <i>F statistics</i>            | 5.087           |                       |                |                    |
| <i>p value</i>                 | 0.000464        |                       |                |                    |
